# Supplementary material for: Nanosponge-Based Composite Gel Polymer Electrolyte for Safer Li-O2 Batteries
Source: MDPI journal article supplement (doi:10.3390/polym13101625), 2021-05-17
Supplement: s1 [file s1]

## Supporting Information

# Nanosponge-based Composite Gel Polymer Electrolyte for Safer Li-O<sub>2</sub> Batteries –

Julia Amici <sup>1,\*</sup>, Claudia Torchio <sup>1</sup>, Daniele Versaci<sup>1</sup>, Davide Dessantis <sup>1</sup>, Andrea Marchisio <sup>1</sup>, Fabrizio Caldera<sup>2</sup>, Carlotta Francia<sup>1</sup> and Silvia Bodoardo <sup>1</sup>

<sup>1</sup> Electrochemistry Group, DISAT, Politecnico di Torino, C.so D.ca degli Abruzzi 24 10128 Torino (TO) ITALY;

<sup>2</sup> Department of Chemistry, Università degli Studi di Torino, Via Pietro Giuria 7, 10125 Torino (TO), ITALY

\* Correspondence: julia.amici@polito.it

**Table S1.** Summary of TGA analysis.

| Sample         | T <sub>5</sub> (°C) | T <sub>50</sub> (°C) |
|----------------|---------------------|----------------------|
| BMA            | 45                  | 88                   |
| PEGDA 575      | 354                 | 401                  |
| NS             | 199                 | 315                  |
| CGPE           | 226                 | 303                  |
| 5 wt% NS CGPE  | 201                 | 303                  |
| 10 wt% NS CGPE | 192                 | 310                  |

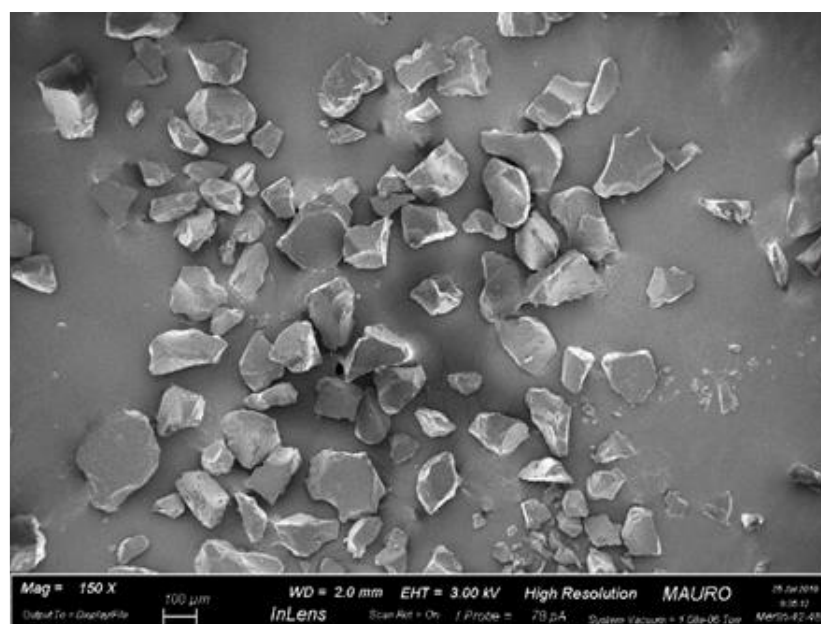

**Figure S1.** FESEM micrograph of raw nanosponge aggregates.

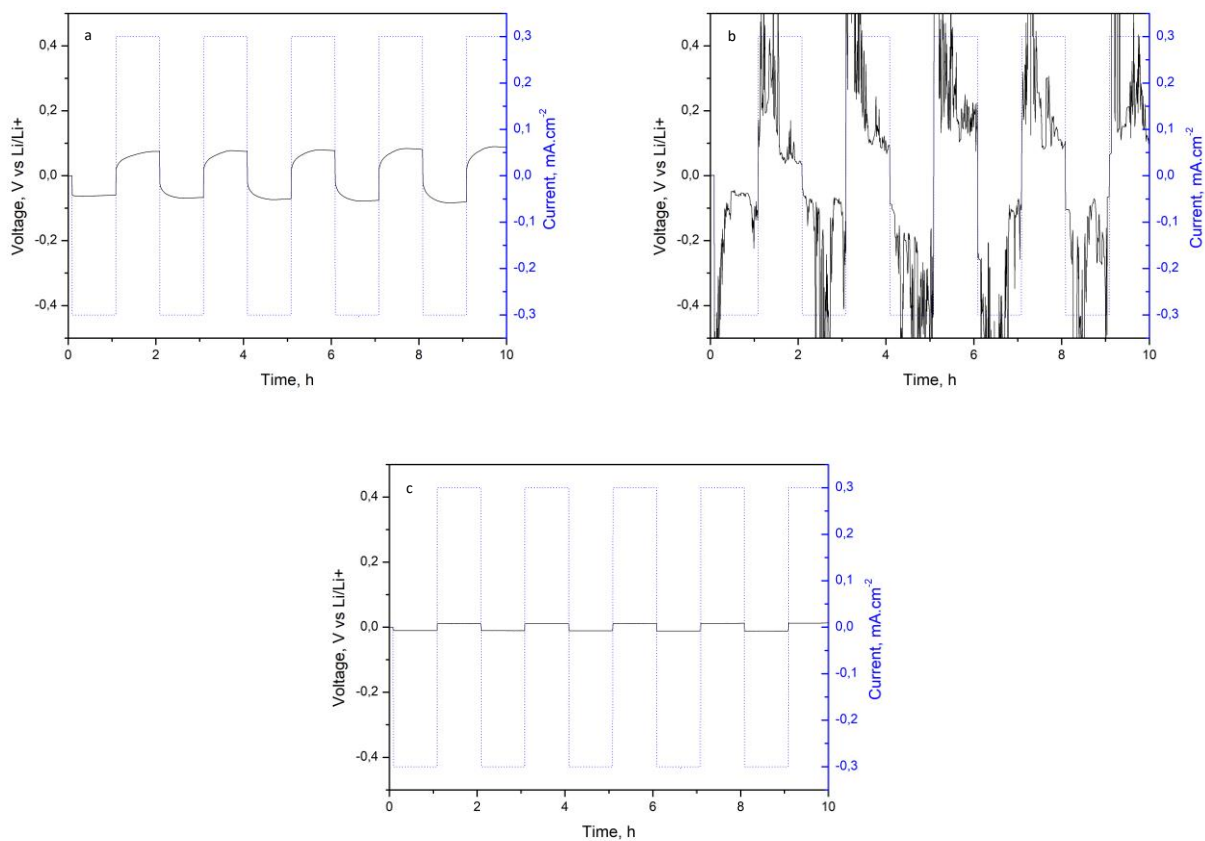

**Figure S2.** Voltage profile of the first 5 cycles of lithium plating/stripping cycling at current density of 0.3 mA·cm<sup>-2</sup> (specific capacity: 0.3 mAh·cm<sup>-2</sup>) on symmetric Li|LE|Li cell (a), Li|CGPE|Li cell (b) and Li|5 wt% NS CGPE|Li cell (c).
